# Supplementary material
Source: PubMed Central journal article supplement (PMC3227788)
Supplement: NIHMS307632-supplement-01.pdf [file NIHMS307632-supplement-01.pdf]

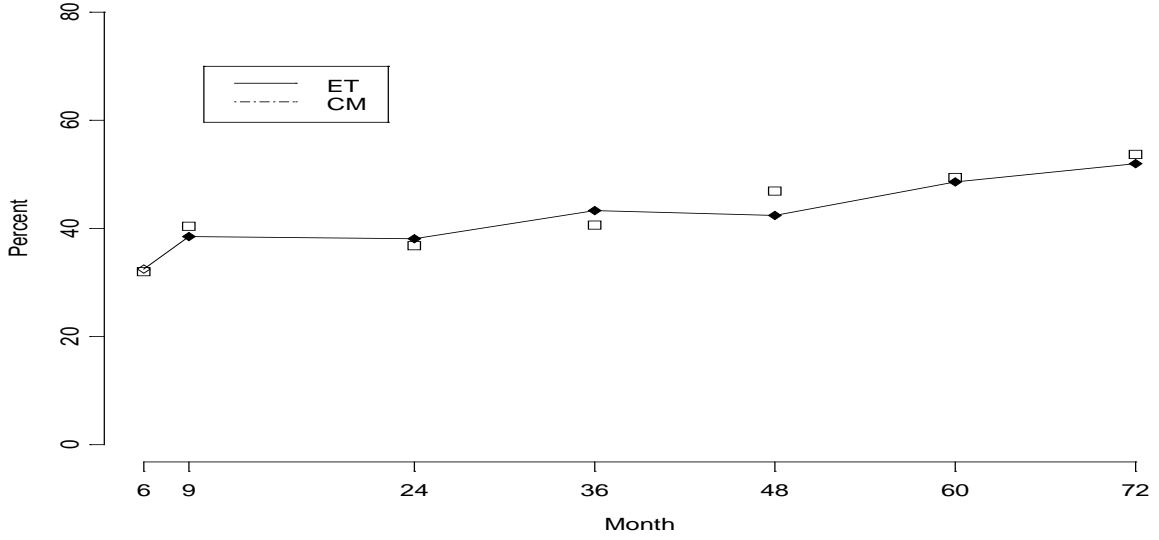

Figure 1A

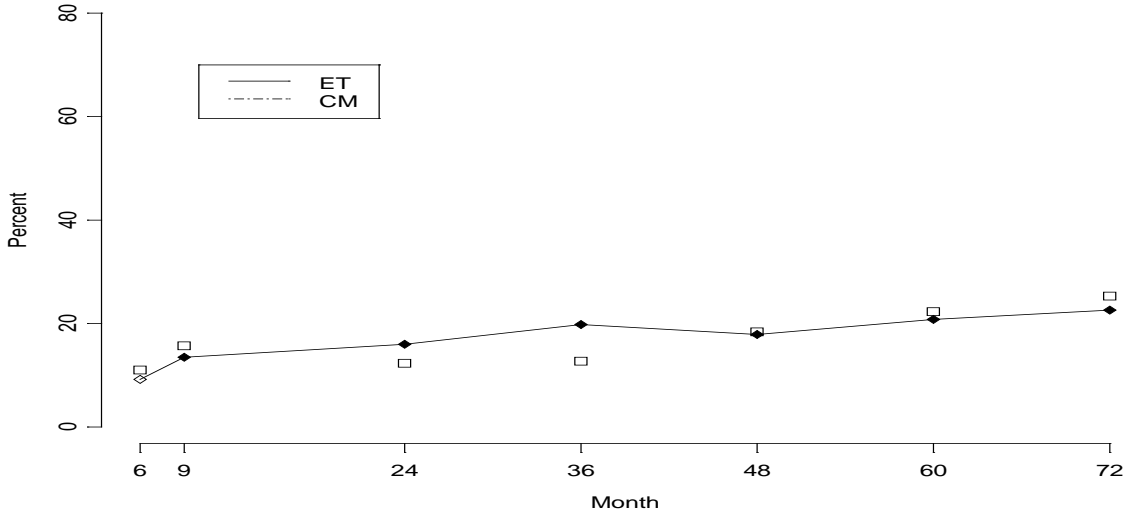

Figure 1B

Figure 1. Prevalence of astigmatism ( $\geq 1.00$  diopter (D) Figure 1A) and high astigmatism ( $\geq 2.00$  D Figure 1B) at 6 and 9 months corrected and at 2, 3, 4, 5, and 6 years postnatal age. (Data from prior to 4 years of age from reference 6). Early-Treated (ET); Conventionally-Managed (CM)
