# Supplementary material
Source: PubMed Central journal article supplement (PMC3227788)
Supplement: NIHMS307632-supplement-03.pdf [file NIHMS307632-supplement-03.pdf]

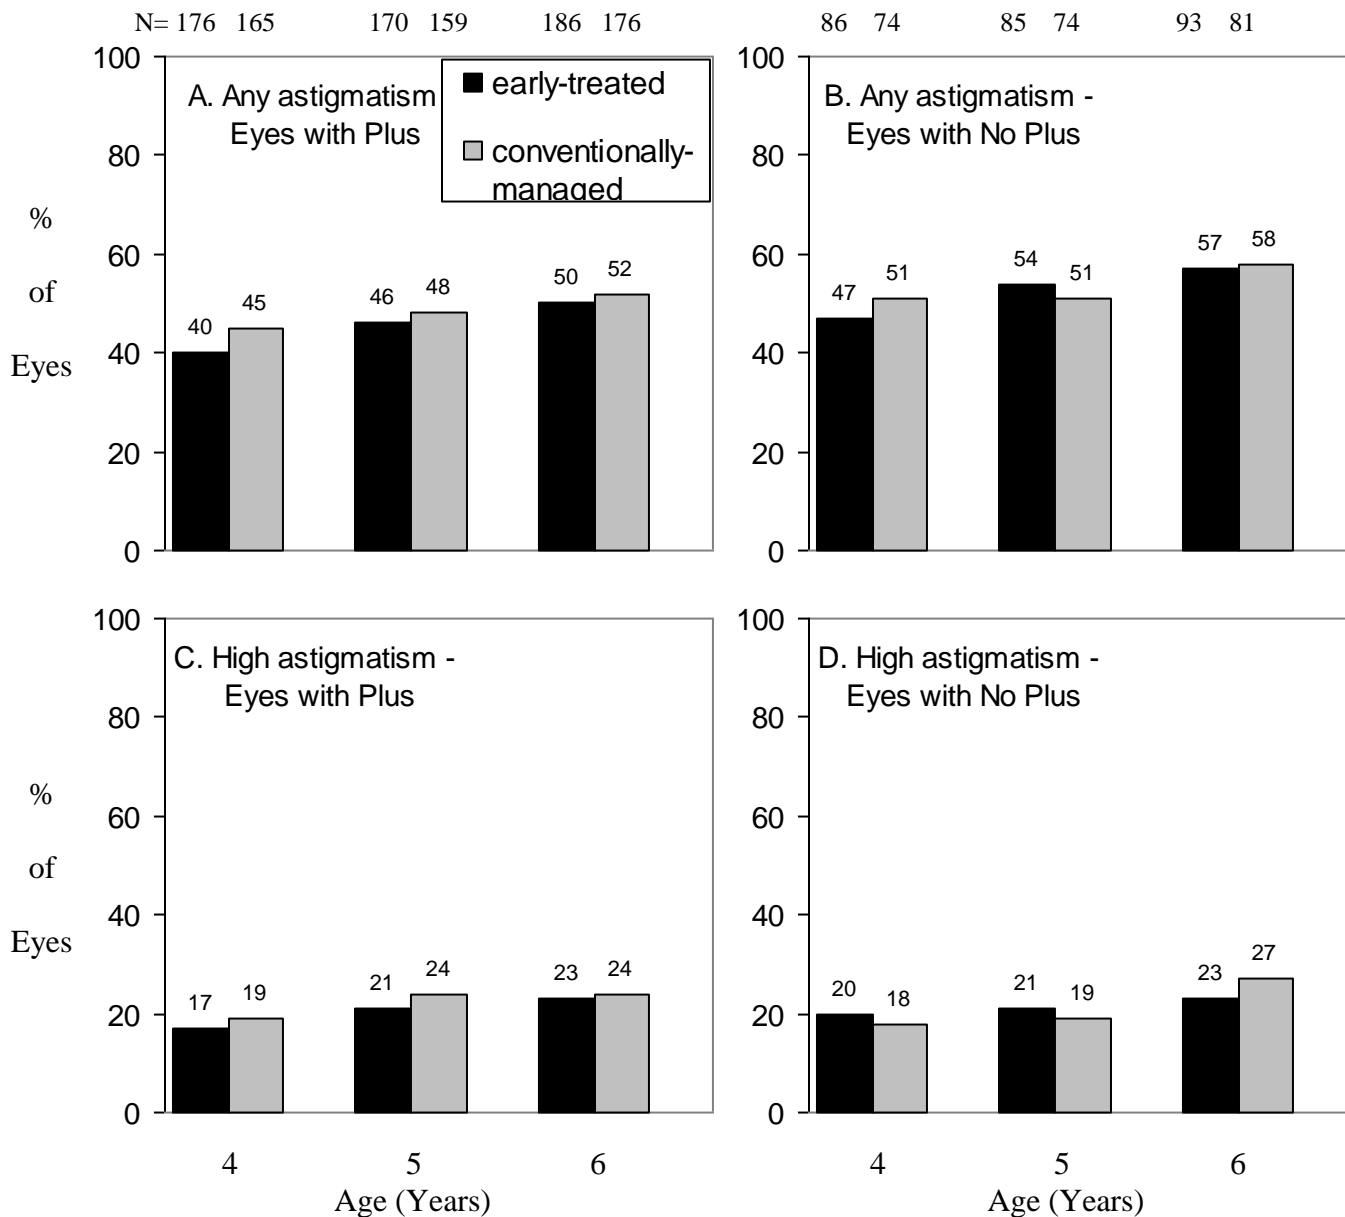

Figure 3. Prevalence of astigmatism ( $\geq 1.00$  diopter (D), Figures 3A and 3B) and high astigmatism ( $\geq 2.00$  D, Figures 3C and 3D) at 4, 5, and 6 years postnatal age as related to the presence or absence of plus disease at the time of the most severe acute-phase retinopathy of prematurity (ROP) in each eye. Numbers above each bar indicate the number of eyes that provided data at each age.
