# Supplementary material
Source: PubMed Central journal article supplement (PMC3227788)
Supplement: NIHMS307632-supplement-04.pdf [file NIHMS307632-supplement-04.pdf]

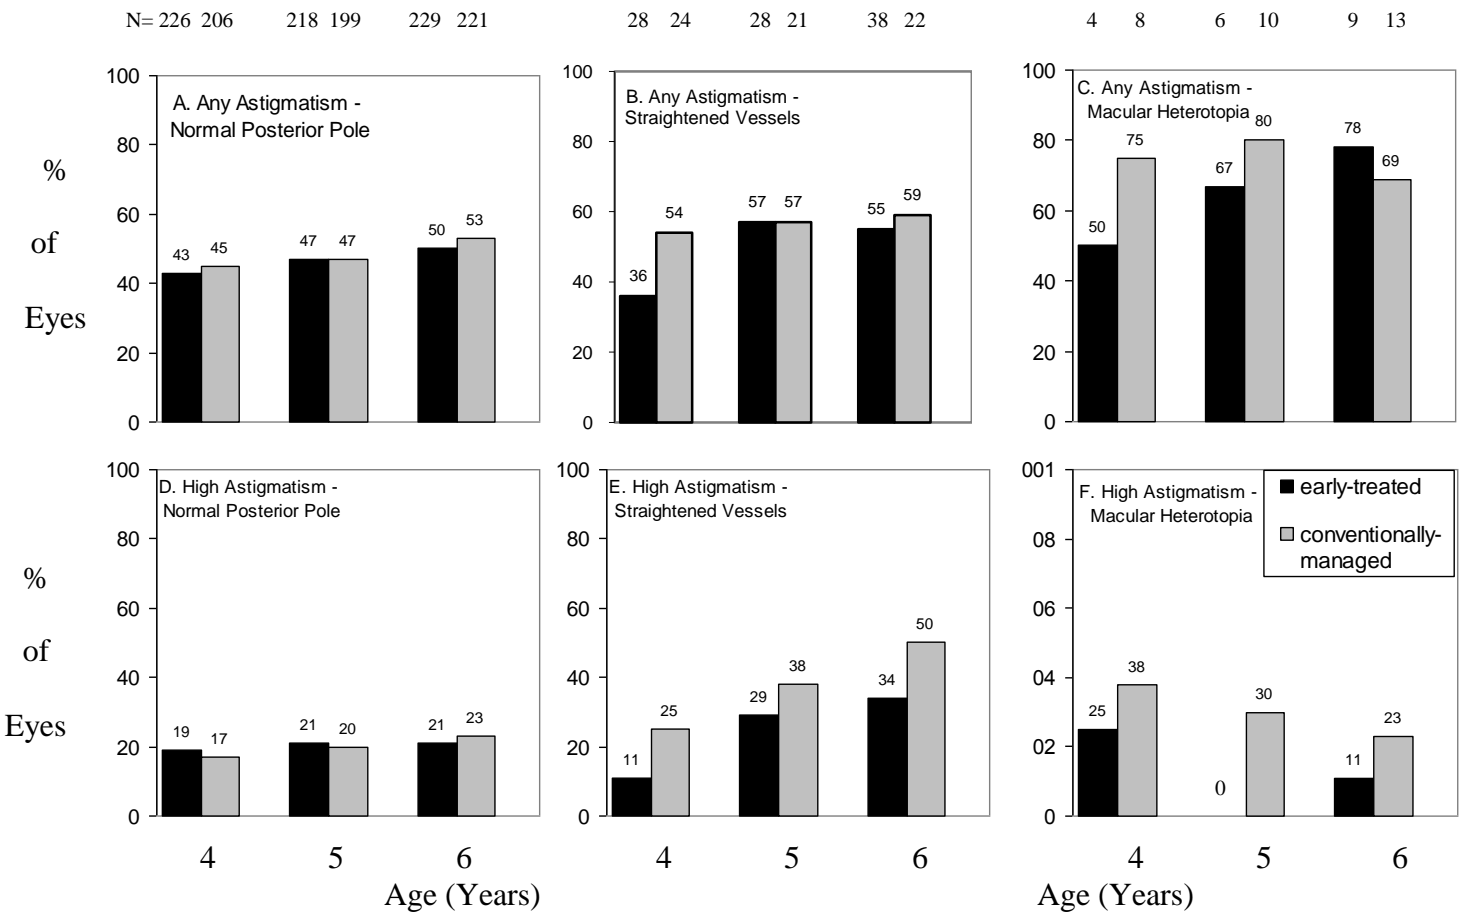

Figure 4. Prevalence of astigmatism ( $\geq 1.00$  diopter (D), Figures 4A, 4B and 4C) and high astigmatism ( $\geq 2.00$  D, Figures 4D, 4E, and 4F) at 4, 5, and 6 years postnatal age as related to severity of retinal residua of retinopathy of prematurity (ROP) in each eye. Black bars indicate prevalence in eyes that underwent treatment at high risk prethreshold ROP; gray bars indicate prevalence in eyes with high risk prethreshold ROP that were managed conventionally. Numbers above each bar indicate the number of eyes that provided data at each age.
