# Supplementary material
Source: PubMed Central journal article supplement (PMC3227788)
Supplement: NIHMS307632-supplement-05.pdf [file NIHMS307632-supplement-05.pdf]

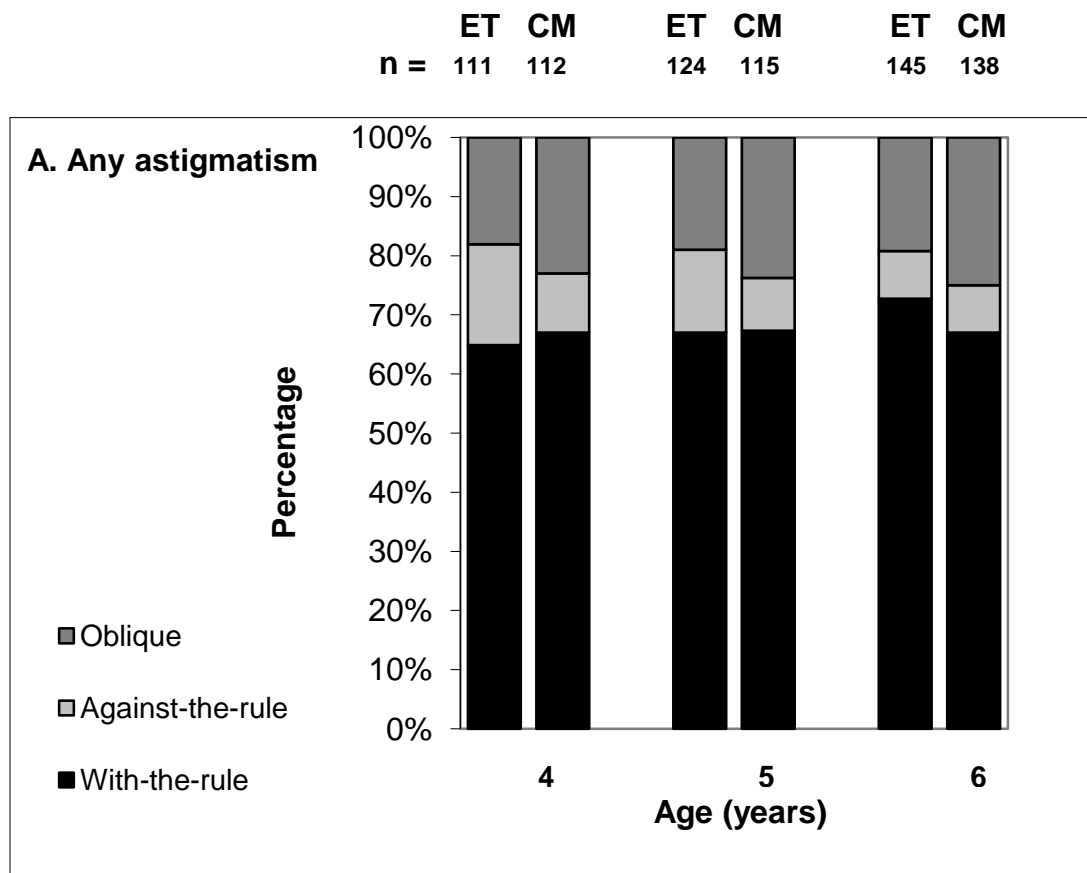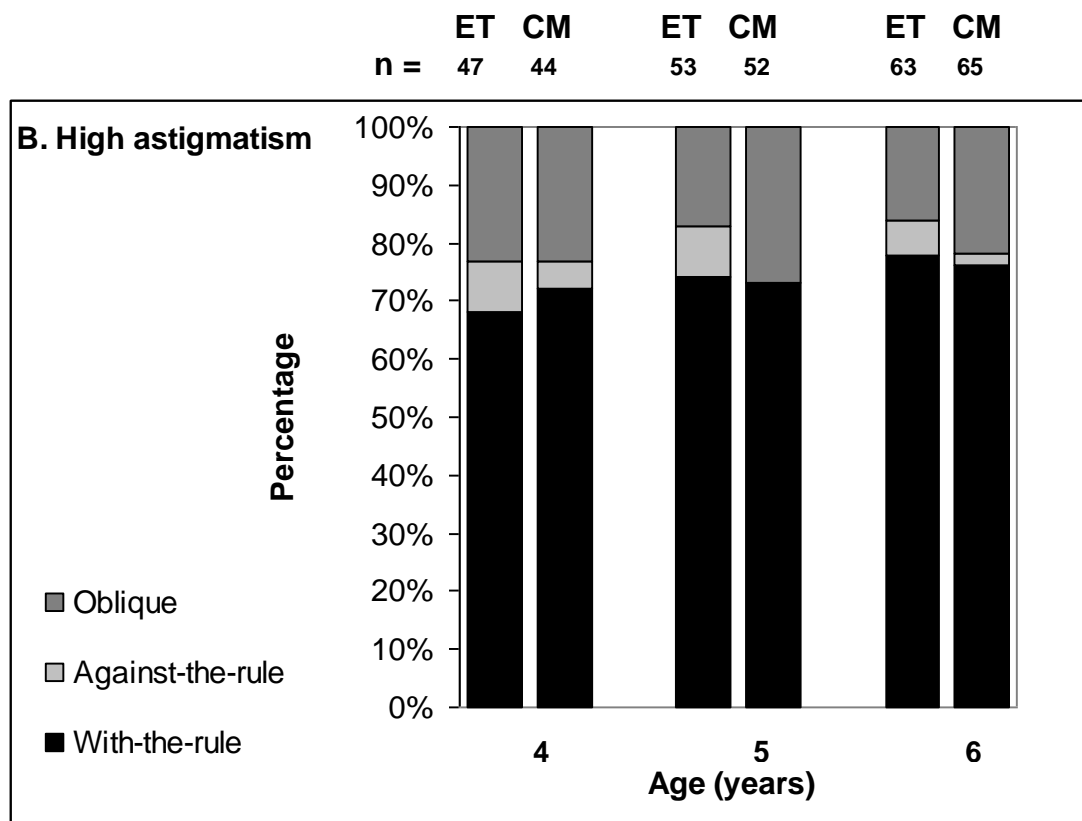

Figure 5. Axis of astigmatism in eyes with any astigmatism ( $\geq 1.00$  diopter (D), Figure 5A) and in eyes with high astigmatism ( $\geq 2.00$  D, Figure 5B) at 4, 5, and 6 years postnatal age. Numbers above each bar indicate the number of eyes that provided data at each age. Early Treated (ET); Conventionally Managed (CM)
